# Supplementary material for: Russian roulette with unlicensed fat-burner drug 2,4-dinitrophenol (DNP): evidence from a multidisciplinary study of the internet, bodybuilding supplements and DNP users
Source: PubMed Central journal article supplement (PMC4607104; doi:10.1186/s13011-015-0034-1), 2015-10-14
Supplement: 13011_2015_34_MOESM2_ESM.pdf [file 13011_2015_34_MOESM2_ESM.pdf]

**Additional file 2: List of retail web-based sites and discussion boards/forums**

|    | <b>URL</b>                                                                                          | <b>Type</b>          | <b>Description</b>                                                                                                                                                                                                                             | <b>Geolocation of the IP address<sup>a</sup></b>        |
|----|-----------------------------------------------------------------------------------------------------|----------------------|------------------------------------------------------------------------------------------------------------------------------------------------------------------------------------------------------------------------------------------------|---------------------------------------------------------|
| 1  | <a href="http://www.tradekey.com">http://www.tradekey.com</a>                                       | Broker               | Sodium crystal 200mg DNP capsules in a tamperproof container. Capsules are 00 size, yellow/white for crystal, green/white for powder, shipping capacity: 1000 capsule. Large discounts for all larger orders; price on request. Ships from UK. | Lansing, Michigan, USA                                  |
| 2  | <a href="http://www.ecplaza.net/dnp-everything.html">http://www.ecplaza.net/dnp-everything.html</a> | Business to business | Offers several Chinese DNP suppliers                                                                                                                                                                                                           | Seoul, Republic of Korea                                |
| 3  | <a href="http://www.anasci.org">http://www.anasci.org</a>                                           | Forum                | Discussion threads on various aspects of DNP use and experiences                                                                                                                                                                               | Orlando, Florida, USA                                   |
| 4  | <a href="http://dinitrophenol.net">http://dinitrophenol.net</a>                                     | Forum                | DNP user experience exchange with the explicitly stated aim to minimize harm                                                                                                                                                                   | Montreal, Canada                                        |
| 5  | <a href="http://forum.bodybuilding.com">http://forum.bodybuilding.com</a>                           | Forum                | Discussion threads on various aspects of DNP use and experiences                                                                                                                                                                               | Boise, Idaho, USA                                       |
| 6  | <a href="http://www.muscletalk.co.uk">http://www.muscletalk.co.uk</a>                               | Forum                | Discussion threads on various aspects of DNP use and experiences                                                                                                                                                                               | (IP address is between the Isle of Man and mainland UK) |
| 7  | <a href="http://www.professionalmuscle.com">http://www.professionalmuscle.com</a>                   | Forum                | Discussion threads on various aspects of DNP use and experiences                                                                                                                                                                               | San Francisco, California, USA                          |
| 8  | <a href="http://thinksteroids.com">http://thinksteroids.com</a>                                     | Forum                | Discussion threads on various aspects of DNP use and experiences                                                                                                                                                                               | New York, New York, USA                                 |
| 9  | <a href="http://www.aboard.in">http://www.aboard.in</a>                                             | Forum                | Discussion threads on various aspects of DNP use and experiences                                                                                                                                                                               | Singapore, Malaysia                                     |
| 10 | <a href="http://www.uglybodybuilding.com">http://www.uglybodybuilding.com</a>                       | Forum                | Discussion threads on various aspects of DNP use and experiences                                                                                                                                                                               | Amsterdam, The Netherlands                              |
| 11 | <a href="http://tnation.t-nation.com">http://tnation.t-nation.com</a>                               | Forum                | Discussion threads on various aspects of DNP use and experiences                                                                                                                                                                               | San Francisco, California, USA                          |
| 12 | <a href="http://evolutionary.org">http://evolutionary.org</a>                                       | Forum                | Discussion threads on various aspects                                                                                                                                                                                                          | San Francisco,                                          |

|    |                                                                                           |       |                                                                  |                                |
|----|-------------------------------------------------------------------------------------------|-------|------------------------------------------------------------------|--------------------------------|
|    |                                                                                           |       | of DNP use and experiences                                       | California, USA                |
| 13 | <a href="http://reddit.com/r/bodybuilding/">http://reddit.com/r/bodybuilding/</a>         | Forum | Discussion threads on various aspects of DNP use and experiences | San Francisco, California, USA |
| 14 | <a href="http://www.bodybuildindex.com">http://www.bodybuildindex.com</a>                 | Forum | Discussion threads on various aspects of DNP use and experiences | Amsterdam, The Netherlands     |
| 15 | <a href="http://www.uk-muscle.co.uk">http://www.uk-muscle.co.uk</a>                       | Forum | Discussion threads on various aspects of DNP use and experiences | Innsbruck, Austria             |
| 16 | <a href="http://www.bodybuildingdungeon.com">http://www.bodybuildingdungeon.com</a>       | Forum | Discussion threads on various aspects of DNP use and experiences | San Jose, California, USA      |
| 17 | <a href="http://www.mindandmuscle.net">http://www.mindandmuscle.net</a>                   | Forum | Discussion threads on various aspects of DNP use and experiences | Sofia, Bulgaria                |
| 18 | <a href="http://community.hypemuscle.com">http://community.hypemuscle.com</a>             | Forum | Discussion threads on various aspects of DNP use and experiences | San Francisco, California, USA |
| 19 | <a href="http://www.canadabodybuilding.com">http://www.canadabodybuilding.com</a>         | Forum | Discussion threads on various aspects of DNP use and experiences | Provo, Utah, USA               |
| 20 | <a href="http://www.ugm.org.uk">http://www.ugm.org.uk</a>                                 | Forum | Discussion threads on various aspects of DNP use and experiences | Leeds, UK                      |
| 21 | <a href="http://www.elitefitness.com">http://www.elitefitness.com</a>                     | Forum | Discussion threads on various aspects of DNP use and experiences | Burnaby, Canada                |
| 22 | <a href="http://www.bodybuildingforums.com.au">http://www.bodybuildingforums.com.au</a>   | Forum | Discussion threads on various aspects of DNP use and experiences | Chicago, Illinois, USA         |
| 23 | <a href="http://anabolicminds.com">http://anabolicminds.com</a>                           | Forum | Discussion threads on various aspects of DNP use and experiences | Dallas, Texas, USA             |
| 24 | <a href="http://forums.isteroids.com">http://forums.isteroids.com</a>                     | Forum | Discussion threads on various aspects of DNP use and experiences | Montreal, Canada               |
| 25 | <a href="http://www.getbig.com">http://www.getbig.com</a>                                 | Forum | Discussion threads on various aspects of DNP use and experiences | Dallas, Texas, USA             |
| 26 | <a href="https://www.tmuscle.co.uk">https://www.tmuscle.co.uk</a>                         | Forum | Discussion threads on various aspects of DNP use and experiences | Manchester, UK                 |
| 27 | <a href="http://www.worldclassbodybuilding.com">http://www.worldclassbodybuilding.com</a> | Forum | Discussion threads on various aspects of DNP use and experiences | Provo, Utah, USA               |
| 28 | <a href="http://www.superiormuscle.com">http://www.superiormuscle.com</a>                 | Forum | Discussion threads on various aspects of DNP use and experiences | Dallas, Texas, USA             |

|    |                                                                                               |                       |                                                                  |                                |
|----|-----------------------------------------------------------------------------------------------|-----------------------|------------------------------------------------------------------|--------------------------------|
| 29 | <a href="http://www.thevipboard.com">http://www.thevipboard.com</a>                           | Forum                 | Discussion threads on various aspects of DNP use and experiences | Provo, Utah, USA               |
| 30 | <a href="http://www.theironden.com">http://www.theironden.com</a>                             | Forum                 | Discussion threads on various aspects of DNP use and experiences | Amsterdam, The Netherlands     |
| 31 | <a href="http://juicedmuscle.com">http://juicedmuscle.com</a>                                 | Forum                 | Discussion threads on various aspects of DNP use and experiences | Bochum, Germany                |
| 32 | <a href="http://projectbodybuilding.com">http://projectbodybuilding.com</a>                   | Forum                 | Discussion threads on various aspects of DNP use and experiences | Culver City, California, USA   |
| 33 | <a href="http://forums.rxmuscle.com">http://forums.rxmuscle.com</a>                           | Forum                 | Discussion threads on various aspects of DNP use and experiences | Beverly Hills, California, USA |
| 34 | <a href="http://www.bodybuilding-hardcore.com">http://www.bodybuilding-hardcore.com</a>       | Forum                 | Guidelines and information on DNP use                            | Scottsdale, Arizona, USA       |
| 35 | <a href="http://www.rebodybuilding.com">http://www.rebodybuilding.com</a>                     | Forum                 | Discussion threads on various aspects of DNP use and experiences | Kaunas, Lithuania              |
| 36 | <a href="http://www.bodybuildingweb.net">http://www.bodybuildingweb.net</a>                   | Forum                 | Discussion threads on various aspects of DNP use and experiences | Houston, Texas, USA            |
| 37 | <a href="http://www.pharmacyreviewer.com">http://www.pharmacyreviewer.com</a>                 | Forum                 | Discussion threads on various aspects of DNP use and experiences | Wilmington, New Jersey, USA    |
| 38 | <a href="http://forums.musculardevelopment.com">http://forums.musculardevelopment.com</a>     | Forum                 | Discussion threads on various aspects of DNP use and experiences | Pine Brook, New Jersey, USA    |
| 39 | <a href="https://testosteronekings.wordpress.com">https://testosteronekings.wordpress.com</a> | Forum                 | Education and information blog                                   | San Francisco, California, USA |
| 40 | <a href="http://brotherhoodofpain.com">http://brotherhoodofpain.com</a>                       | Forum                 | Discussion threads on various aspects of DNP use and experiences | Plaza, Panama                  |
| 41 | <a href="http://www.wannabebig.com">http://www.wannabebig.com</a>                             | Forum                 | Discussion threads on various aspects of DNP use and experiences | Lon Angeles, California, USA   |
| 42 | <a href="http://www.ausbb.com">http://www.ausbb.com</a>                                       | Forum                 | Discussion threads on various aspects of DNP use and experiences | Brea, California, USA          |
| 43 | <a href="http://united-muscle.com">http://united-muscle.com</a>                               | Forum                 | Discussion threads on various aspects of DNP use and experiences | Amsterdam, The Netherlands     |
| 44 | <a href="http://www.bodybuildindex.com">http://www.bodybuildindex.com</a>                     | Forum                 | Discussion threads on various aspects of DNP use and experiences | Amsterdam, The Netherlands     |
| 45 | <a href="http://www.angelfire.com">http://www.angelfire.com</a>                               | Forum/<br>Information | Detailed dosing schedule                                         | Waltham, Massachusetts, USA    |

|    |                                                                               |                          |                                                                                                                                                                                                                        |                                |
|----|-------------------------------------------------------------------------------|--------------------------|------------------------------------------------------------------------------------------------------------------------------------------------------------------------------------------------------------------------|--------------------------------|
| 46 | <a href="http://www.anabolicextreme.com">http://www.anabolicextreme.com</a>   | Forum/Online Information | Discussion threads on various aspects of DNP use and experiences                                                                                                                                                       | Colombus, Ohio, USA            |
| 47 | <a href="http://www.steroidology.com">http://www.steroidology.com</a>         | Forum/Online library     | Information on and discussion boards relating to DNP                                                                                                                                                                   | Garden City, New York, USA     |
| 48 | <a href="http://www.dnpweightloss.com">http://www.dnpweightloss.com</a>       | Online blog              | Discussion threads on various aspects of DNP use and experiences                                                                                                                                                       | Springfield, Missouri, USA     |
| 49 | <a href="http://www.basskilleronline.com">http://www.basskilleronline.com</a> | Online library           | Article on DNP                                                                                                                                                                                                         | Provo, Utah, USA               |
| 50 | <a href="http://imbodybuilding.com">http://imbodybuilding.com</a>             | Online library           | Article on DNP                                                                                                                                                                                                         | Moscow, Russian federation     |
| 51 | <a href="http://anabolics24.com">http://anabolics24.com</a>                   | Retail                   | 100mg Biomax (Biomax Labs, Turkey), 100 capsules for \$80.00; Unknown location; ships to CA, ZA, EU, Asia, US                                                                                                          | Bucharest, Romania             |
| 52 | <a href="http://www.steroid.com/DNP.php">http://www.steroid.com/DNP.php</a>   | Retail                   | Does not sell DNP but gives reference to UnderGround Lab for availability (one 200mg pill for \$1.00)                                                                                                                  | San Francisco, California, USA |
| 53 | <a href="http://dinitroshop.net">http://dinitroshop.net</a>                   | Retail                   | 1 200mg powder capsule for \$2.80                                                                                                                                                                                      | Cedar Knolls, New Jersey, USA  |
| 54 | <a href="http://www.steroidmall.eu">http://www.steroidmall.eu</a>             | Retail                   | Self-proclaimed "online pharmacy that provides secure transactions between patients and medical providers"; Sells in bulk; 224 Euros for 100 x 200mg capsules; contact information is for London, UK                   | (close to) Brasov, Romania     |
| 55 | <a href="http://crystaldnp.com">http://crystaldnp.com</a>                     | Retail                   | Capsules (Sodium Salt, 250 mg/capsule for \$1.00 per capsule); ships from Canada to AU, CA, EU, Other, UK, US                                                                                                          | Hague, The Netherlands         |
| 56 | <a href="http://myanabol.com">http://myanabol.com</a>                         | Retail                   | Resale website; 100mg (\$195) or 200mg (\$234) per 100 capsules, undisclosed location (possibly Turkey); ships to CA, EU, US; On custom seizure situations, one time reshipment for free; 98% delivery success claimed | (close to) Nicosia, Cyprus     |
| 57 | <a href="http://www.absolutesteroids.com">http://www.absolutesteroids.com</a> | Retail                   | 200mg/capsule; 99% crystalline DNP                                                                                                                                                                                     | unavailable                    |

|    |                                                                                                 |        |                                                                                                                                                            |                     |
|----|-------------------------------------------------------------------------------------------------|--------|------------------------------------------------------------------------------------------------------------------------------------------------------------|---------------------|
|    |                                                                                                 |        | for \$170.00; AU, CA, EU, US Products are by BR-Europe/Pumping Iron (now combined as UmForte); source is probably Turkey                                   |                     |
| 58 | <a href="http://1buysteroids.net">http://1buysteroids.net</a>                                   | Retail | 250 mg/capsule for \$4.00, ships worldwide from undisclosed location.                                                                                      | unavailable         |
| 59 | <a href="http://buyinjectables.com">http://buyinjectables.com</a>                               | Retail | 100 x 200mg capsule; 99% crystalline DNP for 129 Euros; shopts from undisclosed location to CA, EU, US                                                     | unavailable         |
| 60 | <a href="http://www.buy-anabolic-steroids.com/en/">http://www.buy-anabolic-steroids.com/en/</a> | Retail | 30 x 100mg capsules for \$48; ships worldwide from undisclosed location.                                                                                   | Zurich, Switzerland |
| 61 | <a href="http://levram.us">http://levram.us</a>                                                 | Retail | Crystal, 25m capsules (\$125.00); AbaXenPharmaceuticals; no longer sells DNP                                                                               | Siauliai, Lithuania |
| 62 | <a href="http://www.isteroids.com">http://www.isteroids.com</a>                                 | Retail | Does not sell DNP but provides information                                                                                                                 | Montreal, Canada    |
| 63 | <a href="http://www.vpxsports.com">http://www.vpxsports.com</a>                                 | Retail | Does not sell DNP but provides information                                                                                                                 | Austin, Texas, USA  |
| 64 | <a href="http://www.xroids.com">http://www.xroids.com</a>                                       | Retail | Does not sell DNP but provides information                                                                                                                 | Huerth, Germany     |
| 65 | <a href="http://www.legitanabolics.net">http://www.legitanabolics.net</a>                       | Retail | 60 x 200mg capsules for 120 Euros, Manufacturer: Bodyadvance Performance; claim that it ships from the European Union                                      | Penang, Malaysia    |
| 66 | <a href="http://buyabsolutesteroid.com">http://buyabsolutesteroid.com</a>                       | Retail | 200 mg x 100 for \$170; ships worldwide, prides in 98% success rate in shipping (except Germany) and offers a 'custom seize guarantee' except to Australia | Istanbul, Turkey    |
| 67 | <a href="http://www.buy-clenbuterol.eu">http://www.buy-clenbuterol.eu</a>                       | Retail | 200 mg x 11 capsules (one cycle) for \$70; ships from Europe to worldwide via registered mail                                                              | Plovdiv, Bulgaria   |
| 68 | <a href="http://www.roidsmall.net">http://www.roidsmall.net</a>                                 | Retail | 30 x 100 mg capsules for \$60;                                                                                                                             | Huerth, Germany     |

|    |                                                                                                 |        |                                                                                                                                                                                                                                                                                                                           |                            |
|----|-------------------------------------------------------------------------------------------------|--------|---------------------------------------------------------------------------------------------------------------------------------------------------------------------------------------------------------------------------------------------------------------------------------------------------------------------------|----------------------------|
|    |                                                                                                 |        | manufacturer: Gen-Shi Laboratories, Japan; ships worldwide with reship guarantee except for Australia, Canada, New Zealand, Singapore, South Korea                                                                                                                                                                        |                            |
| 69 | <a href="http://www.anabolicsteroid-powder.com">http://www.anabolicsteroid-powder.com</a>       | Retail | Powder DNP, minimum order 100g, price is negotiated, origin: China                                                                                                                                                                                                                                                        | Seattle, Washington, USA   |
| 70 | <a href="http://allsteroidsworld.com">http://allsteroidsworld.com</a>                           | Retail | 100 mg capsules                                                                                                                                                                                                                                                                                                           | Dronten, The Netherlands   |
| 71 | <a href="http://www.ianabolicsteroids.com">http://www.ianabolicsteroids.com</a>                 | Retail | Does not sell DNP but provides information and reference to the UnderGround Lab                                                                                                                                                                                                                                           |                            |
| 72 | <a href="http://sellsteroids.en.made-in-china.com">http://sellsteroids.en.made-in-china.com</a> | Retail | Wholesale; US\$ 1.0/kg 99% USP DNP powder (origin: China), production capacity: 1000 kg/month                                                                                                                                                                                                                             | San Antonio, Texas, USA    |
| 73 | <a href="http://www.steroid.bz">http://www.steroid.bz</a>                                       | Retail | Does not sell DNP but supply reference to the UnderGround Lab                                                                                                                                                                                                                                                             | Montreal, Canada           |
| 74 | <a href="http://www.massroids.net">http://www.massroids.net</a>                                 | Retail | Gen-Shi Lab, 30 x 100 mg caps (packaging is labeled as supplement with L-Glutamin)                                                                                                                                                                                                                                        | Huerth, Germany            |
| 75 | <a href="http://www.isp.org.cn">http://www.isp.org.cn</a>                                       | Retail | Wholesale powder DNP, sold as "DNP anabolic steroid hormones"                                                                                                                                                                                                                                                             | Beijing, China             |
| 76 | <a href="http://www.steroidmall.eu">http://www.steroidmall.eu</a>                               | Retail | 100 x 200mg capsules for 224 Euros                                                                                                                                                                                                                                                                                        | (close to) Brasov, Romania |
| 77 | <a href="http://www.anabolic-steroids.biz">http://www.anabolic-steroids.biz</a>                 | Retail | 30 x 100 mg/caps, white tablets, for \$60; manufacturer: Gen-Shi Labs; ships worldwide for \$28 (shipping for order over \$600 is free); reship guarantee except to reship the products only once. Be aware that we are not reshipping to the following locations: Australia, Canada, New Zealand, Singapore, South Korea | Amsterdam, The Netherlands |
| 78 | <a href="http://www.steroidbazaar.com">http://www.steroidbazaar.com</a>                         | Retail | 100 x 200 mg capsules for \$170.00;                                                                                                                                                                                                                                                                                       | Istanbul, Turkey           |

|    |                                                                                                                         |              |                                                                                                                                    |                                   |
|----|-------------------------------------------------------------------------------------------------------------------------|--------------|------------------------------------------------------------------------------------------------------------------------------------|-----------------------------------|
|    |                                                                                                                         |              | ships worldwide, prides in 98% success rate in shipping (except Germany) and offers a 'custom seize guarantee' except to Australia |                                   |
| 79 | <a href="http://drmallkins.en.com51.com">http://drmallkins.en.com51.com</a>                                             | Retail       | Seller is identified as "drmallkins" with a mailing address in Ukraine                                                             | Central district, Hong Kong       |
| 80 | <a href="http://pharmaeu.net">http://pharmaeu.net</a>                                                                   | Retail       | 100 capsules x 100mg for €33.65                                                                                                    | Rotterdam, The Netherlands        |
| 81 | <a href="http://www.neomed.com">http://www.neomed.com</a>                                                               | Retail       | 30 x 100mg/capsules (Gen-SHi Labs) for \$60.00;                                                                                    | Huerth, Germany                   |
| 82 | <a href="http://umforteshop.com">http://umforteshop.com</a>                                                             | Retail       | 25 x 100mg capsules for \$57; authorised reseller of UmForte products;                                                             | Southfield, Michigan, USA         |
| 83 | <a href="http://buydnponline.com">http://buydnponline.com</a>                                                           | Retail       | 25 x 100mg capsules for \$57; authorised reseller of UmForte products;                                                             | Southfield, Michigan, USA         |
| 84 | <a href="http://www.daddyroids.com">http://www.daddyroids.com</a>                                                       | Retail       | 30 x 100mg (Gen-Shi Lab) for \$60.00;                                                                                              | Huerth, Germany                   |
| 85 | <a href="http://cheaperpharma.com">http://cheaperpharma.com</a>                                                         | Retail       | 50 x 200mg capsules (origin brand: Signature Pharmaceuticals, Greece) for \$60.00                                                  | Rotterdam, The Netherlands        |
| 86 | <a href="http://www.musclechemistry.com">http://www.musclechemistry.com</a>                                             | Retail/Forum | Does not sell DNP but runs discussion                                                                                              | (close to) Engelberg, Switzerland |
| 87 | <a href="http://ec91141043.sell.curiosexpeditions.org">http://ec91141043.sell.curiosexpeditions.org</a>                 | Retail       | Place of origin: China<br>Powder, price quoted, minimum order 100g<br>Discrete shipping                                            | Beijing, China                    |
| 88 | <a href="http://anabolicsteroidpowder.sell.nccecojustice.org/">http://anabolicsteroidpowder.sell.nccecojustice.org/</a> | Retail       | Place of origin: China<br>Chrystal, price negotiable, minimum order 100g; Discrete shipping                                        | Zurich, Switzerland               |
| 89 | <a href="http://www.vjirdv.com/">http://www.vjirdv.com/</a>                                                             | Retail       | HongKong Bodybuilding Biopharmaceutical Co.,Ltd<br>Powder (wholesale), price quoted,<br>Place of origin China; Minimum order:      | Los Angeles, USA                  |
| 90 |                                                                                                                         |              |                                                                                                                                    |                                   |
|    | <a href="http://www.shuzixizang.com/">http://www.shuzixizang.com/</a>                                                   |              |                                                                                                                                    | San Francisco, USA                |

|    |                                                                                                         |        |                                                                                                                                                                                                |                |
|----|---------------------------------------------------------------------------------------------------------|--------|------------------------------------------------------------------------------------------------------------------------------------------------------------------------------------------------|----------------|
|    |                                                                                                         |        | 10g; supply ability :5000kg/month; Shipment worldwide with reship policy; 100% pass to UK, Norway, Poland, Spain, USA, Canada, Brazil; 98% pass to Germany, Russia, Australia and New Zealand. |                |
| 91 | <a href="http://rawsteroidpowder.sell.everychina.com/">http://rawsteroidpowder.sell.everychina.com/</a> | Retail | Shenzhen Shijingu Technology Co., Ltd. Crystal; Place of origin China; Minimum order: 10g; supply ability :500000kg/month                                                                      | Beijing, China |
| 92 | <a href="http://m.steroid-supplement.com/">http://m.steroid-supplement.com/</a>                         | Retail | Powder; Place of origin Hong Kong; Minimum order: 100g; supply ability :1000kg/month                                                                                                           | Dallas, USA    |

<sup>a</sup> IPligence™ online free IP geolocator (<http://www.ipligence.com/geolocation>) was used to search for the geographical location of the website IPs
